# Supplementary material
Source: PubMed Central journal article supplement (PMC4793984)
Supplement: pacd022584.ww1_default.pdf [file pacd022584.ww1_default.pdf]

**Table A: Power calculations for sample size and allocation ratio**

| Comparison                                | Mean (SD) log MenC rSBA used            | Significance   | Non-inferiority margin | Estimated difference | Power | Single Infant Dose MenC-CRM group | Two Infant Dose MenC-CRM group | Single Infant Dose MenC-TT group | Control (0 dose) group | TOTAL REQUIRED |
|-------------------------------------------|-----------------------------------------|----------------|------------------------|----------------------|-------|-----------------------------------|--------------------------------|----------------------------------|------------------------|----------------|
| Primary                                   | 3.5 (0.9) [a]                           | 2.5% (1-sided) | 10%                    | -0.35                | 0.9   | 140                               | 140                            |                                  |                        |                |
| Secondary                                 | 3.32 (0.72) [a]                         | 5% (2-sided)   |                        | 0.332                | 0.9   | 140                               |                                | 100                              |                        |                |
| Secondary (not reported in current paper) | 2.85 (0.48) [b]                         | 5% (2-sided)   |                        | 10%                  | 0.95  | 60                                |                                |                                  | 56                     |                |
|                                           | Adjusting for 12.5% dropout/sample loss |                |                        |                      |       | <b>160</b>                        | <b>160</b>                     | <b>114</b>                       | <b>64</b>              | 498            |
|                                           | Allocation Ratio                        |                |                        |                      |       | 10                                | 10                             | 7                                | 4                      |                |

[a] Borrow R, Goldblatt D, Finn A, et al. Infect Immun. Oct 2003;71(10):5549-5555.

[b] Snape MD, MacLennan J, Lockhart S, et al. Paed Infect Dis J. 2009. Feb;28(2):92-7.

**Table B: MenC rSBA GMTs induced at the specified timelines following the different MenC vaccination schedules**

| Blood sampling Visit | Single infant dose MenC-CRM (Group 1) |                             | Two infant dose MenC-CRM (Group 2) |                           | Control Group (Group 3) |                         | Single infant dose MenC-TT (Group 4) |                                |
|----------------------|---------------------------------------|-----------------------------|------------------------------------|---------------------------|-------------------------|-------------------------|--------------------------------------|--------------------------------|
|                      | N                                     | GMTs (95% CI)               | N                                  | GMTs (95% CI)             | N                       | GMTs (95% CI)           | N                                    | GMTs (95% CI)                  |
| <b>5 month</b>       | 144                                   | 53.56<br>(42.95-66.83)      | 137                                | 620.54<br>(494.31-778.04) | 56                      | 2.18*<br>(1.83-2.59)    | 99                                   | 169.27<br>(129.72 – 221.31)    |
| <b>12 month</b>      | 147                                   | 4.42<br>(3.32 – 5.87)       | 128                                | 8.31<br>(6.11-11.30)      | 54                      | 2.0<br>(2.0 – 2.0)      | 93                                   | 9.29<br>(6.47 – 13.3)          |
| <b>13 month</b>      | 136                                   | 660.61<br>(498.04 – 876.24) | 126                                | 295.36<br>(220.30-398.11) | 54                      | 121.59<br>(77.8-190.11) | 84                                   | 2779.24<br>(1940.89 – 3981.07) |
| <b>24 month</b>      | 136                                   | 6.17<br>(4.56 – 8.35)       | 127                                | 4.09<br>(2.99-5.58)       | 55                      | 5.02<br>(3.13 – 8.05)   | 95                                   | 123.41<br>(86.1 – 177.01)      |

\*One infant in the Control Group had detectable MenC rSBA, very likely reflecting transplacentally acquired maternal antibody.

**Table C:** Frequency of expected local and systemic adverse events by group (ITT population)

| Adverse events             | Single infant dose MenC-CRM (Group 1) |    | Two infant dose MenC-CRM (Group 2) |    | Control Group (Group 3) |    | Single infant dose MenC-TT (Group 4) |    |
|----------------------------|---------------------------------------|----|------------------------------------|----|-------------------------|----|--------------------------------------|----|
|                            | n                                     | %  | n                                  | %  | n                       | %  | n                                    | %  |
| <b>*2 months: Systemic</b> |                                       |    |                                    |    |                         |    |                                      |    |
| Fever $\geq$ 38°C          | 3                                     | 2  | 3                                  | 2  | 1                       | 2  | 4                                    | 3  |
| Decreased appetite         | 52                                    | 32 | 54                                 | 34 | 17                      | 26 | 36                                   | 31 |
| Drowsiness                 | 99                                    | 60 | 92                                 | 58 | 35                      | 53 | 70                                   | 60 |
| Irritability               | 102                                   | 62 | 115                                | 72 | 43                      | 65 | 78                                   | 67 |
| <b>*3 months: Local</b>    |                                       |    |                                    |    |                         |    |                                      |    |
| Pain                       | 24                                    | 15 | 35                                 | 22 |                         |    | 18                                   | 16 |
| Redness                    | 57                                    | 35 | 66                                 | 45 |                         |    | 42                                   | 38 |
| Swelling                   | 19                                    | 12 | 24                                 | 16 |                         |    | 16                                   | 14 |
| Induration                 | 31                                    | 19 | 39                                 | 25 |                         |    | 23                                   | 20 |
| <b>*3 months: Systemic</b> |                                       |    |                                    |    |                         |    |                                      |    |
| Fever $\geq$ 38°C          | 4                                     | 2  | 5                                  | 3  | 3                       | 5  | 2                                    | 2  |
| Decreased appetite         | 42                                    | 25 | 33                                 | 21 | 11                      | 17 | 29                                   | 25 |
| Drowsiness                 | 74                                    | 45 | 80                                 | 50 | 28                      | 43 | 45                                   | 39 |
| Irritability               | 102                                   | 62 | 105                                | 66 | 37                      | 57 | 73                                   | 63 |
| <b>4 months: Local</b>     |                                       |    |                                    |    |                         |    |                                      |    |
| Pain                       |                                       |    | 27                                 | 17 |                         |    |                                      |    |
| Redness                    |                                       |    | 73                                 | 49 |                         |    |                                      |    |
| Swelling                   |                                       |    | 25                                 | 16 |                         |    |                                      |    |
| Induration                 |                                       |    | 40                                 | 26 |                         |    |                                      |    |
| <b>*4 months: Systemic</b> |                                       |    |                                    |    |                         |    |                                      |    |
| Fever $\geq$ 38°C          | 5                                     | 3  | 7                                  | 4  | 2                       | 3  | 3                                    | 3  |
| Decreased appetite         | 34                                    | 21 | 41                                 | 26 | 10                      | 16 | 27                                   | 24 |
| Drowsiness                 | 65                                    | 39 | 65                                 | 41 | 23                      | 37 | 47                                   | 42 |
| Irritability               | 95                                    | 58 | 92                                 | 59 | 38                      | 60 | 71                                   | 63 |
| <b>*5 months: Local</b>    |                                       |    |                                    |    |                         |    |                                      |    |
| Pain                       | 35                                    | 22 | 38                                 | 25 | 12                      | 19 | 30                                   | 29 |
| Redness                    | 74                                    | 49 | 76                                 | 56 | 28                      | 47 | 48                                   | 50 |
| Swelling                   | 31                                    | 20 | 34                                 | 23 | 13                      | 22 | 23                                   | 23 |
| Induration                 | 44                                    | 29 | 42                                 | 28 | 16                      | 26 | 31                                   | 31 |
| <b>*5 months: Systemic</b> |                                       |    |                                    |    |                         |    |                                      |    |
| Fever $\geq$ 38°C          | 12                                    | 8  | 15                                 | 10 | 6                       | 10 | 4                                    | 4  |
| Decreased appetite         | 50                                    | 32 | 52                                 | 35 | 18                      | 29 | 33                                   | 32 |
| Drowsiness                 | 62                                    | 39 | 51                                 | 34 | 21                      | 34 | 37                                   | 35 |
| Irritability               | 85                                    | 53 | 86                                 | 57 | 38                      | 61 | 58                                   | 55 |

\*All p values for all comparisons between the groups were >0.05.
